# Supplementary material for: A Semi-automated Organoid Screening Method Demonstrates Epigenetic Control of Intestinal Epithelial Differentiation
Source: PubMed Central journal article supplement (PMC7872100; doi:10.3389/fcell.2020.618552), 2021-01-21
Supplement: Data_Sheet_2.pdf [file Data_Sheet_2.pdf]

**Table 1:  
Inhibitors**

| Source           | ProbeName    | InternalProbeID | ProbeSynonyme                  | PubChem_CID | ChEMBL        | ChEBI        | InChIKey                     | InhibitorClass | Target                                                | TargetSynonyme     | StockConc [mM] | WorkingConc [µM] |
|------------------|--------------|-----------------|--------------------------------|-------------|---------------|--------------|------------------------------|----------------|-------------------------------------------------------|--------------------|----------------|------------------|
| Sigma Aldrich    | DMSO         |                 |                                | 679         | CHEMBL504     | CHEBI:28262  | IAZDPXIOMUYVGZ-UHFFFAOYSA-N  | Ctrl           |                                                       |                    | 10             | 10               |
| Cayman Chemicals | VPA          |                 |                                | 3121        | CHEMBL109     | CHEBI:83766  | NIJYAXOARWZEE-UHFFFAOYSA-N   | Ctrl           |                                                       |                    | 100            | 1000             |
| SGC              | (+)-JQ1      | 1               |                                | 46907787    | CHEMBL1957266 | CHEBI:137113 | DNVXATUJDDPDM-KRWDZBQOSA-N   | BRD_BET        | BRD2, BRD3, BRD4, BRDT (BET)                          |                    | 10             | 0.2              |
| SGC              | bromosporine | 7               |                                | 72943187    | CHEMBL3133807 | CHEBI:95080  | UYBRROMMFMPIAN-UHFFFAOYSA-N  | BRD_BET        | pan-Bromodomain                                       |                    | 10             | 1                |
| SGC              | PFI-1        | 10              | PF-6405761                     | 71271629    | CHEMBL2179387 |              | TXZPMHMLPKIUGK-UHFFFAOYSA-N  | BRD_BET        | BRD2, BRD4                                            |                    | 10             | 1                |
| SGC              | SGC-CBP30    | 16              |                                | 72201027    | CHEMBL3622373 | CHEBI:95079  | GEPYBHCJBORHCE-SFHVURJKSA-N  | BRD_HAT        | CREBBP, EP300                                         | CBP, P300          | 10             | 1                |
| SGC              | I-CBP112     | 28              |                                | 90488984    | CHEMBL3774655 |              | YKNAKDFZAWQEEO-IBGZPJMESA-N  | BRD_HAT        | CREBBP, EP300                                         | CBP, P300          | 10             | 3                |
| SGC              | BI-9564      | 6               |                                | 117072549   | CHEMBL3823101 |              | BJFSUDWKXGMUKA-UHFFFAOYSA-N  | BRD            | BRD9, BRD7                                            |                    | 10             | 1                |
| SGC              | I-BRD9       | 27              | GSK602                         | 91668541    | CHEMBL3769507 |              | WRUWGLUCNBMGPS-UHFFFAOYSA-N  | BRD            | BRD9                                                  |                    | 10             | 1                |
| SGC              | LP99         | 32              |                                | 91827372    | CHEMBL3753082 |              | LVDRREOUMKACNJ-BKMJKUQGSA-N  | BRD            | BRD9, BRD7                                            |                    | 10             | 1                |
| SGC              | PFI-4        | 13              |                                | 40642506    | CHEMBL3356143 |              | QCIJLRJBZDBVDB-UHFFFAOYSA-N  | BRD            | BRPF1B                                                |                    | 10             | 1                |
| SGC              | NI-57        | 35              |                                | 91827373    | CHEMBL3752151 |              | UEMQPCYDWCVCU-UHFFFAOYSA-N   | BRD            | BRPF1, BRPF2, BRPF3                                   |                    | 10             | 1                |
| SGC              | OF1          | 37              |                                | 35397514    | CHEMBL3770173 |              | YUNQZQREIHWDQT-UHFFFAOYSA-N  | BRD            | BRPF1B, BRPF2                                         |                    | 10             | 5                |
| SGC              | BAZ2-ICR     | 5               |                                | 91654625    | CHEMBL4296718 |              | RRZVGDGTWNQAPW-UHFFFAOYSA-N  | BRD            | BAZ2A, BAZ2B                                          |                    | 10             | 1                |
| SGC              | GSK2801      | 9               |                                | 73010930    | CHEMBL3739699 |              | KHWCPNJRJCNVRI-UHFFFAOYSA-N  | BRD            | BAZ2A, BAZ2B                                          |                    | 10             | 3                |
| SGC              | PFI-3        | 12              |                                | 78243717    | CHEMBL3752911 |              | INAICLVUAKEPB-QSTFCLMNSA-N   | BRD            | SMARCA, PB1                                           |                    | 10             | 1                |
| SGC              | NVS-1        | 36              |                                | 117072550   | CHEMBL3785432 | CHEBI:149519 | XVECNLUKQDKOST-UHFFFAOYSA-N  | BRD            | CECR2                                                 |                    | 10             | 1                |
| SGC              | GSK14        | 25              |                                | 71729975    | CHEMBL3183531 |              | WBKCKEHGXNWMO-UHFFFAOYSA-N   | KDM            | JMJD3                                                 | KDM6B              | 10             | 5                |
| SGC              | IOX2         | 30              |                                | 54685215    | CHEMBL3186774 | CHEBI:95077  | CAOSCCRYLQBS-UHFFFAOYSA-N    | KDM            | HIF-1α prolyl hydroxylase-2 (PHD2), JMJD2, JMJD3, FIH | HPH1, EGLN2, KMD4A | 10             | 1                |
| SGC              | GSK-LSD1     | 26              |                                | 71522234    | CHEMBL4301645 | CHEBI:95087  | BASFYRLYJAZPPL-UONOGXRCSA-N  | KDM            | LSD1                                                  | KDM1A              | 10             | 1                |
| SGC              | IOX1         | 29              |                                | 459617      | CHEMBL1230640 |              | JGRPKOGHYBAVMW-UHFFFAOYSA-N  | KDM            | 2OG oxygenases, including the JmjC demethylases       |                    | 10             | 10               |
| SGC              | UNC1999      | 20              |                                | 72551585    | CHEMBL3414619 | CHEBI:93239  | DPJNKUOXBZSAI-UHFFFAOYSA-N   | PMT_KMT        | EZH2                                                  |                    | 10             | 3                |
| SGC              | GSK343       | 21              |                                | 71268957    | CHEMBL2204995 |              | ULNXAWLQZMIHX-UHFFFAOYSA-N   | PMT_KMT        | EZH2                                                  |                    | 10             | 3                |
| SGC              | OICR9429     | 38              |                                | 91623360    | CHEMBL3798846 | CHEBI:95086  | DJOVLOYCGXNVPI-UHFFFAOYSA-N  | PMT_KMT        | WDR5                                                  | MLL1               | 10             | 3                |
| SGC              | A-366        | 3               |                                | 76285486    | CHEMBL3109630 |              | BKCDJTRMYWSXMC-UHFFFAOYSA-N  | PMT_KMT        | EHMT1, EHMT2                                          | G9a, GLP           | 10             | 1                |
| SGC              | UNC0638      | 17              |                                | 46224516    | CHEMBL1231795 |              | QOECJCVIMVJGX-UHFFFAOYSA-N   | PMT_KMT        | EHMT1, EHMT2                                          | G9a, GLP           | 10             | 1                |
| SGC              | UNC0642      | 18              |                                | 53315878    | CHEMBL2441082 | CHEBI:95074  | RNAMYOYQYRYFYQ-UHFFFAOYSA-N  | PMT_KMT        | EHMT1, EHMT2                                          | G9a, GLP           | 10             | 1                |
| SGC              | PFI-2        | 11              |                                | 71300326    | CHEMBL3414622 |              | JCKGSPAAPQRPBW-OAQYLSRUSA-N  | PMT_KMT        | SETD7                                                 |                    | 10             | 1                |
| SGC              | A-196        | 2               |                                | 117072548   |               |              | ABGOSOMRWSYAOB-UHFFFAOYSA-N  | PMT_KMT        | SUV420H1/H2                                           |                    | 10             | 1                |
| SGC              | BAY-598      | 4               |                                | 117072551   | CHEMBL3818617 |              | OTTJIRVZJGFTK-SFHVURJKSA-N   | PMT_KMT        | SMYD2                                                 |                    | 10             | 1                |
| SGC              | MS023        | 33              |                                | 92136227    | CHEMBL3901808 |              | FMTVWAGUJRUAKE-UHFFFAOYSA-N  | PMT_PRMT       | PRMT1, PRMT3, PRMT4, PRMT6, PRMT8                     |                    | 10             | 5                |
| SGC              | SGC707       | 15              |                                | 90642938    | CHEMBL4072005 |              | DMIDPTCQPIUYFE-UHFFFAOYSA-N  | PMT_PRMT       | PRMT3                                                 |                    | 10             | 1                |
| SGC              | MS049        | 34              |                                | 53868701    | CHEMBL3961701 |              | HBOJWAYLSJLUG-UHFFFAOYSA-N   | PMT_PRMT       | PRMT4, PRMT6                                          |                    | 10             | 5                |
| SGC              | GSK591       | 23              |                                | 117072552   |               |              | TWKYXZSXXXKJU-FQEVSTJZSA-N   | PMT_PRMT       | PRMT5                                                 |                    | 10             | 1                |
| SGC              | SGC0946      | 14              |                                | 56962337    | CHEMBL3087498 |              | IQCKJUKAQJINMK-HUBRGWSESA-N  | PMT_PRMT       | DOT1L                                                 |                    | 10             | 1                |
| SGC              | GSK484       | 22              |                                | 86340151    |               |              | MULKOGJHUZTANI-ADMBKAPUSA-N  | PMT_PRMT       | PAD-4                                                 | PADI4              | 10             | 10               |
| SGC              | UNC1215      | 19              |                                | 57339144    | CHEMBL2426364 |              | PQOOIERVZAXHBP-UHFFFAOYSA-N  | MBT            | L3MBTL3                                               |                    | 10             | 1                |
| SGC              | CI-994       | 8               | N-acetyldinaline, Tacedinaline | 2746        | CHEMBL235191  |              | VAZAPHZUAVEOMC-UHFFFAOYSA-N  | HDAC           | HDAC1, HDAC2, HDAC3, HDAC8                            |                    | 10             | 10               |
| SGC              | LAQ824       | 31              | Dacinostat                     | 6445533     | CHEMBL356066  | CHEBI:90195  | BWDQBBUCWLSASG-MDZDMXLPISA-N | HDAC           | HDAC                                                  |                    | 10             | 1                |
| SGC              | GSK864       | 24              |                                | 91864701    |               | CHEBI:94063  | DUCNNEYLFOQFSW-PMERELPUSA-N  | other          | Mutant isocitrate dehydrogenase 1                     | IDH1               | 10             | 0.3              |
| SGC              | olaparib     | 39              | AZD2281, KU0059436             | 23725625    | CHEMBL521686  |              | FDLYAMZZIXQODN-UHFFFAOYSA-N  | other          | PARP                                                  |                    | 10             | 1                |
| SantaCruz        | TC-E5003     |                 |                                | 87052       | CHEMBL1797447 | CHEBI:39867  | SHRCVZJKZGIHQ-UHFFFAOYSA-N   | follow-up      | PRMT1                                                 |                    | 50             | 50               |
