# Supplementary material for: A Semi-automated Organoid Screening Method Demonstrates Epigenetic Control of Intestinal Epithelial Differentiation
Source: PubMed Central journal article supplement (PMC7872100; doi:10.3389/fcell.2020.618552), 2021-01-21
Supplement: Data_Sheet_3.pdf [file Data_Sheet_3.pdf]

**Table 2:**  
**qRT-PCR primers & probes**

| Gene   | IEC_lineage     | Used_in_screen | Primer_fwd                 | Primer_rev             | Probe    | Product_length |
|--------|-----------------|----------------|----------------------------|------------------------|----------|----------------|
| Hprt   | no              | yes            | cctcctcagaccgctttt         | aacctggttcatcatcgctaa  | UPL_#95  | 91             |
| Alpi   | Enterocyte      | yes            | aggatccatctgtcctttggt      | ttcagctgccttctgttcc    | UPL_#33  | 75             |
| Lgr5   | Stem            | yes            | cttactcgggtgcagtct         | gatcagccagctaccaaattag | UPL_#60  | 75             |
| Defa21 | Paneth          | no             | gagcagccaggggaagat         | cgatttctacaaaggcagatca | UPL_#64  | 110            |
| Defa22 | Paneth          | yes            | gatgaagagactaatactgaggagca | cgttttctacaaaggcagatca | UPL_#64  | 131            |
| Defa29 | Paneth          | no             | tgaagagactaaaactgaggagca   | caccacggaaaccttcttg    | UPL_#6   | 99             |
| Lyz1   | Paneth          | yes            | ggcaaaacccaagatctaa        | tctctcaccaccttcttg     | UPL_#46  | 104            |
| Mptx2  | Paneth          | no             | tccaagaagagcacaatgga       | aaatgcctttccctcatgct   | UPL_#105 | 99             |
| Agr2   | Goblet          | yes            | cctcaacctggtctatgaaaca     | accgtcagggatgggtcta    | UPL_#2   | 93             |
| Ccl9   | Goblet          | no             | caagggcttgaattgaaatg       | tcttgaacctgaatccgtgag  | UPL_#27  | 90             |
| Muc2   | Goblet          | yes            | cacgagcccaggaagtacag       | gcaaagccactaactcctgt   | UPL_#105 | 88             |
| Chga   | Enteroendocrine | yes            | aacttcaagacctggctctcc      | ctcaaagctgctgtgtgct    | UPL_#33  | 131            |
| Chgb   | Enteroendocrine | yes            | cctctcaaatgccctatcca       | caccttgaccttcttccact   | UPL_#47  | 92             |
| Cpe    | Enteroendocrine | yes            | ccggaagagactctcaaaagc      | cggacaaacctttaaacc     | UPL_#105 | 95             |
| Gfr3a  | Enteroendocrine | no             | tgatcctgctactggtgctg       | ctctgtggcaaggagtttc    | UPL_#5   | 65             |
| Dclk1  | Tuft            | yes            | agaaggcacagcttgacaga       | gttattgtggcaggaatctgg  | UPL_#25  | 74             |
| Gfi1b  | Tuft            | yes            | gttgctgaaccagagccttc       | ttgggtgtcacgagagg      | UPL_#45  | 64             |
| Lrmp   | Tuft            | no             | gctgcttatggagactacaga      | tccgttttctgtggtctga    | UPL_#55  | 90             |
| Pou2f3 | Tuft            | no             | caaagcagcaatgaaactctc      | tgattccaacggtacctga    | UPL_#78  | 69             |
| Trpm5  | Tuft            | yes            | ttctagatggtgtccacaaaa      | gcagaggggtccctgaat     | UPL_#33  | 80             |
